# Supplementary material for: Liver Metabolomics and Inflammatory Profiles in Mouse Model of Fentanyl Overdose Treated with Beta-Lactams
Source: MDPI journal article supplement (doi:10.3390/metabo13080965), 2023-08-21
Supplement: s1 [file s1]

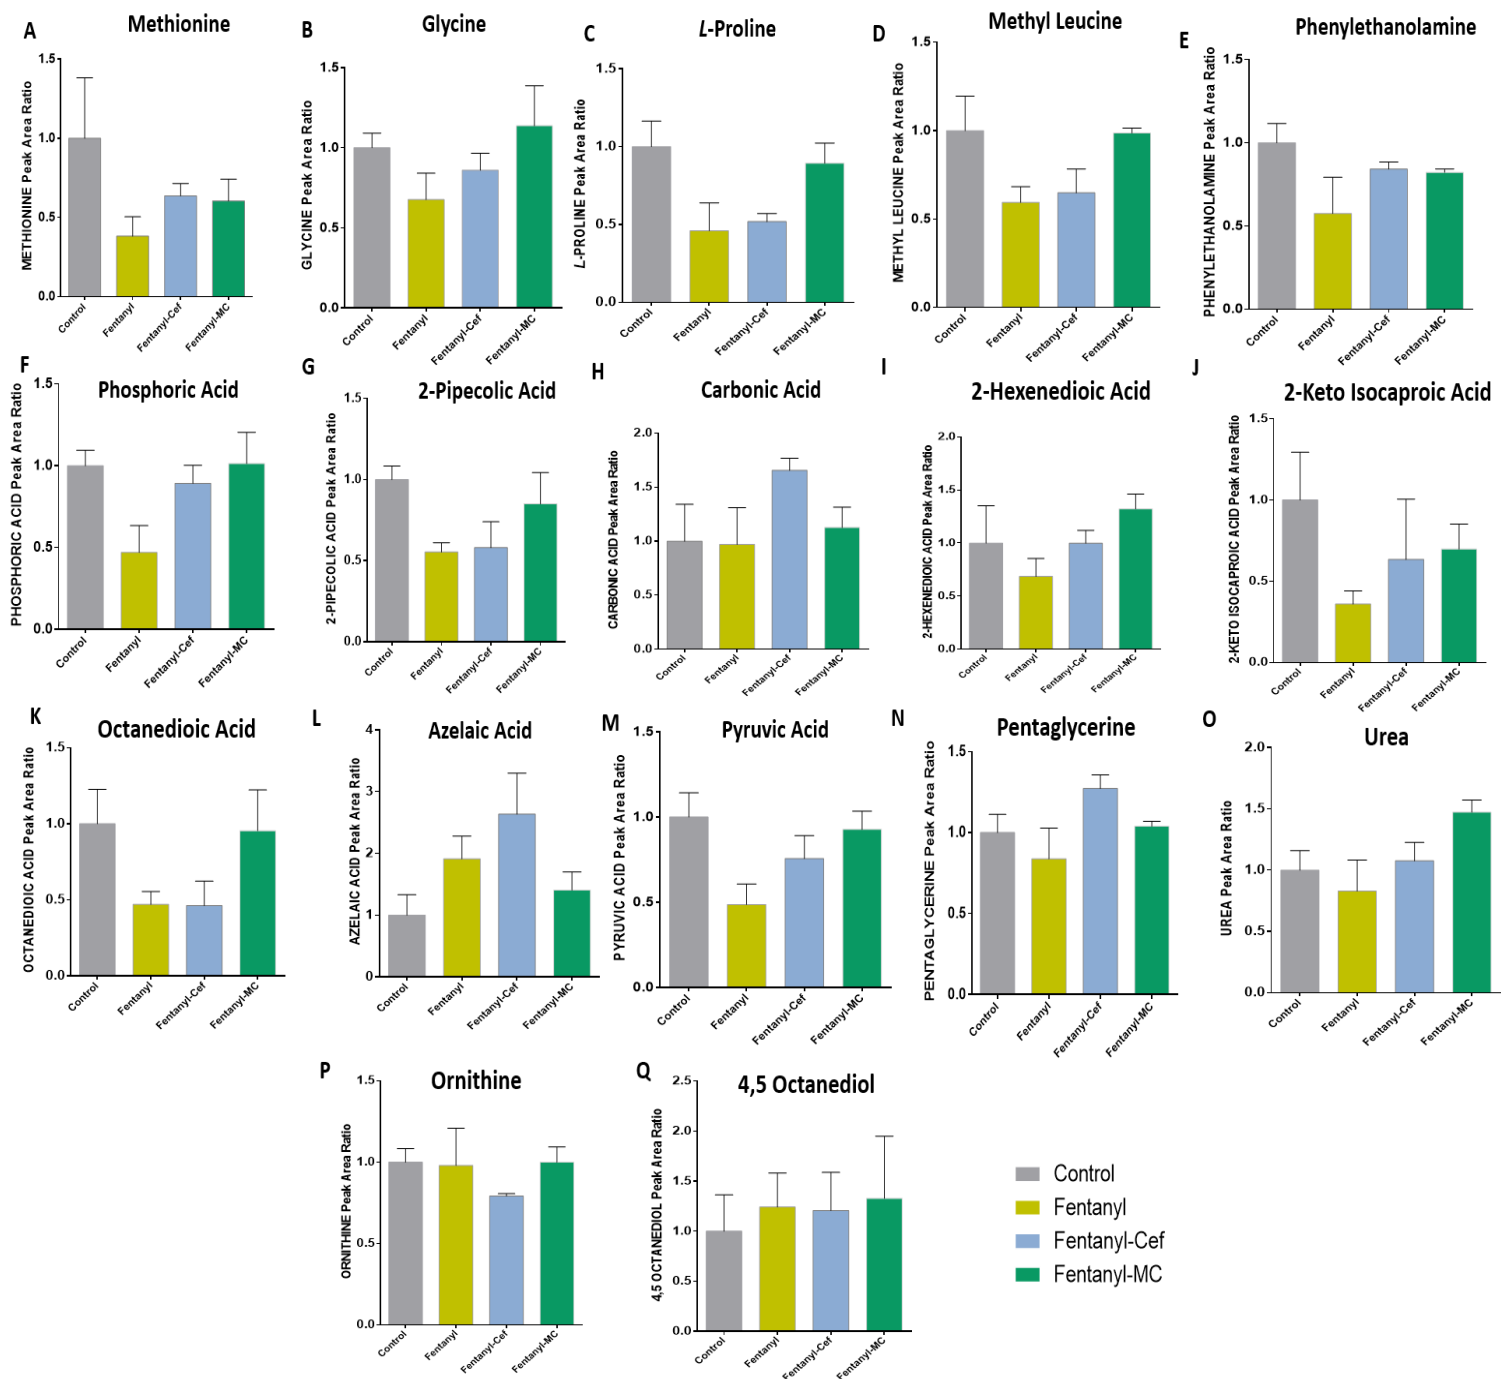

Figure S1. One-way ANOVA test followed by Holm-Sidak's multiple comparisons showed non-significant differences methionine (A), glycine (B), *l*-proline (C), methyl leucine (D), phenylethanolamine (E), phosphoric acid (F), 2-pipecolic acid (G), carbonic acid (H), 2-hexenedioic acid (I), 2-keto isocaproic acid (J), octanedioic acid (K), azelaic acid (L), pyruvic acid (M), pentaglycerine (N), urea (O), ornithine (P) and 4,5 octanediol (Q) between the groups. Data are reported as mean  $\pm$  SEM. Cef, ceftriaxone; MC, MC-100093.
